# Supplementary material
Source: publisher figshare collection journal article supplement (https://sage.figshare.com/ndownloader/files/16406879)
Supplement: Supplementary file 1 [file 16406879]

## Supplementary materials

# Disassortative network structure improves the synchronization between neurons in the suprachiasmatic nucleus

Changgui Gu<sup>1\*</sup>, Xiangwei Gu<sup>1</sup>, Ping Wang<sup>1</sup>, Henggang Ren<sup>1</sup>, Tongfeng Weng<sup>1</sup>, Huijie Yang<sup>1</sup>, and Jos HT Rohling<sup>2\*</sup>

<sup>1</sup>Business School, University of Shanghai for Science and Technology, Shanghai 200093, China

<sup>2</sup>Laboratory for Neurophysiology, Department of Cell and Chemical Biology, Leiden University Medical Center, Leiden, The Netherlands

\*To whom correspondence should be addressed:

ChangguiGu, Email: [gu\\_changgui@163.com](mailto:gu_changgui@163.com) Phone: +8613641697344

Jos HT Rohling, Email: [J.H.T.Rohling@lumc.nl](mailto:J.H.T.Rohling@lumc.nl) Phone: +31 71 526 9762

## I Effect of lag in the method of transfer entropy

We also check the case of  $lag = 2$  in Eq. (1). The results for  $lag = 2$  shown in Fig. S1 is consistent with Fig. 2 ( $lag = 1$ ) in the main text.

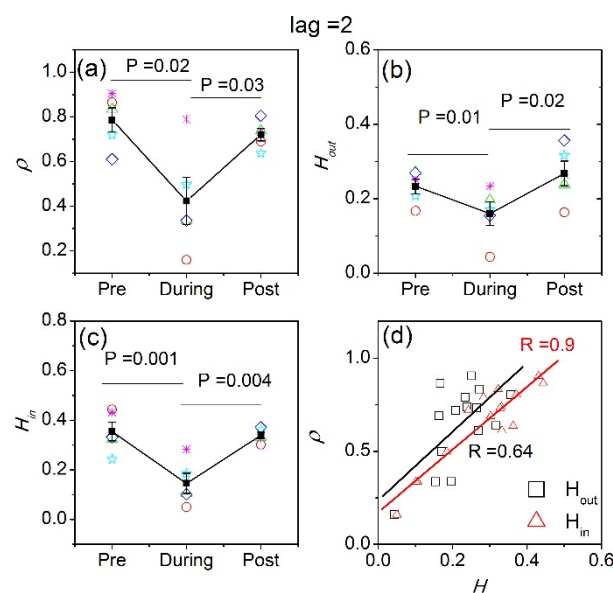

Fig. S1 The results of  $lag = 2$ . This figure corresponds to Fig. 2.

## II Distribution of out-degree

The heterogeneity can be explained by the distribution of the node degree, i.e., if the distribution satisfies a power-law form, the network is considered to be heterogeneous. Figure S2 shows the distribution of out-degree in log-log plot for all derived networks. It is evident that the range of out-degree is from 1 to ~100, almost across two scales for each stage, and a power-law form is observed in the distribution of out-degree in each network in (a-e) for pre-TTX, in (f-j) for during-TTX and in (k-o) for post-TTX. The scaling exponent  $b$  differs between the stages. In particular, the exponent of during-TTX  $-1.50 \pm 0.12$  (mean $\pm$ se) is significantly smaller than pre-TTX  $-1.36 \pm 0.11$  (paired t-test,  $P=0.05$ ) or post-TTX  $1.31 \pm 0.06$  (paired t-test,  $P=0.01$ ).

Based on the method of Ref.[1], we calculate the Log-likelihood ratio  $L_R$  for the out-degrees within each network. If  $L_R > 0$ , the out-degrees are more likely in the power-law distribution, and if  $L_R < 0$ , the out-degrees are more likely in the exponential distribution. Table S1 shows that the out-degrees of most the networks examined in this paper more likely satisfy a power-law distribution, with the exception of SCN3 or SCN5 in the stage of post-TTX.

**Table S1 Log-likelihood ratio  $L_R$  between power-law distribution and exponential distribution for out-degrees.** If  $L_R > 0$ , the out-degrees are more likely in the power-law distribution, and if  $L_R < 0$ , the out-degrees are more likely in the exponential distribution.  $P$  is the significance value for that direction (the value of  $p > 0.05$  corresponds to significant result).

| $L_R, P$ | SCN1       | SCN2       | SCN3       | SCN4       | SCN5        |
|----------|------------|------------|------------|------------|-------------|
| pre-TTX  | 0.82, 0.41 | 0.63, 0.53 | 0.05, 0.96 | 1.43, 0.15 | 0.97, 0.33  |
| dur-TTX  | 1.09, 0.27 | 0.56, 0.58 | 1.11, 0.27 | 0.95, 0.34 | 3.02, 0.00  |
| post-TTX | 5.47, 0.00 | 1.30, 0.19 | 0.00, 1.00 | 1.05, 0.29 | -0.24, 0.81 |

## III Distribution of in-degree

Figure S3 shows the distribution of in-degree in log-log plot for all derived networks. It is evident that the range of in-degree is from 1 to ~100, almost across two scales for each stage, and a power-law form is observed in the distribution of in-degree in each network in (a-e) for pre-TTX, in (f-j) for during-TTX and in (k-o) for post-TTX. The scaling exponent  $b$  differs between the stages. In particular, the exponent of during-TTX  $-1.92 \pm 0.21$  (mean $\pm$ se) is significantly smaller than pre-TTX  $-1.45 \pm 0.14$  (paired t-test,  $P=0.01$ ) or post-TTX  $1.41 \pm 0.09$  (paired t-test,  $P=0.02$ ).

Based on the method of Ref.[1], we also calculate the Log-likelihood ratio  $L_R$  for the in-degrees within each network. Table S2 shows that the in-degrees of nine of the networks examined in this paper more likely satisfy a power-law distribution, and the in-degrees of the other six networks

more likely satisfy in an exponential distribution.

**Table S2 Log-likelihood ratio  $L_R$  between power-law distribution and exponential distribution for in-degrees.** If  $L_R > 0$ , the in-degrees are more likely in the power-law distribution, and if  $L_R < 0$ , the in-degrees are more likely in the exponential distribution.  $P$  is the significance value for that direction (the value of  $p > 0.05$  corresponds to significant result).

| $L_R, P$ | SCN1        | SCN2        | SCN3        | SCN4       | SCN5        |
|----------|-------------|-------------|-------------|------------|-------------|
| pre-TTX  | 5.76, 0.00  | -1.10, 0.27 | -0.49, 0.62 | 0.32, 0.75 | -0.61, 0.54 |
| dur-TTX  | -0.33, 0.74 | 0.93, 0.35  | -3.16, 0.00 | 0.67, 0.50 | 1.34, 0.18  |
| post-TTX | -0.48, 0.00 | 5.10, 0.00  | 5.32, 0.00  | 6.22, 0.00 | 0.41, 0.68  |

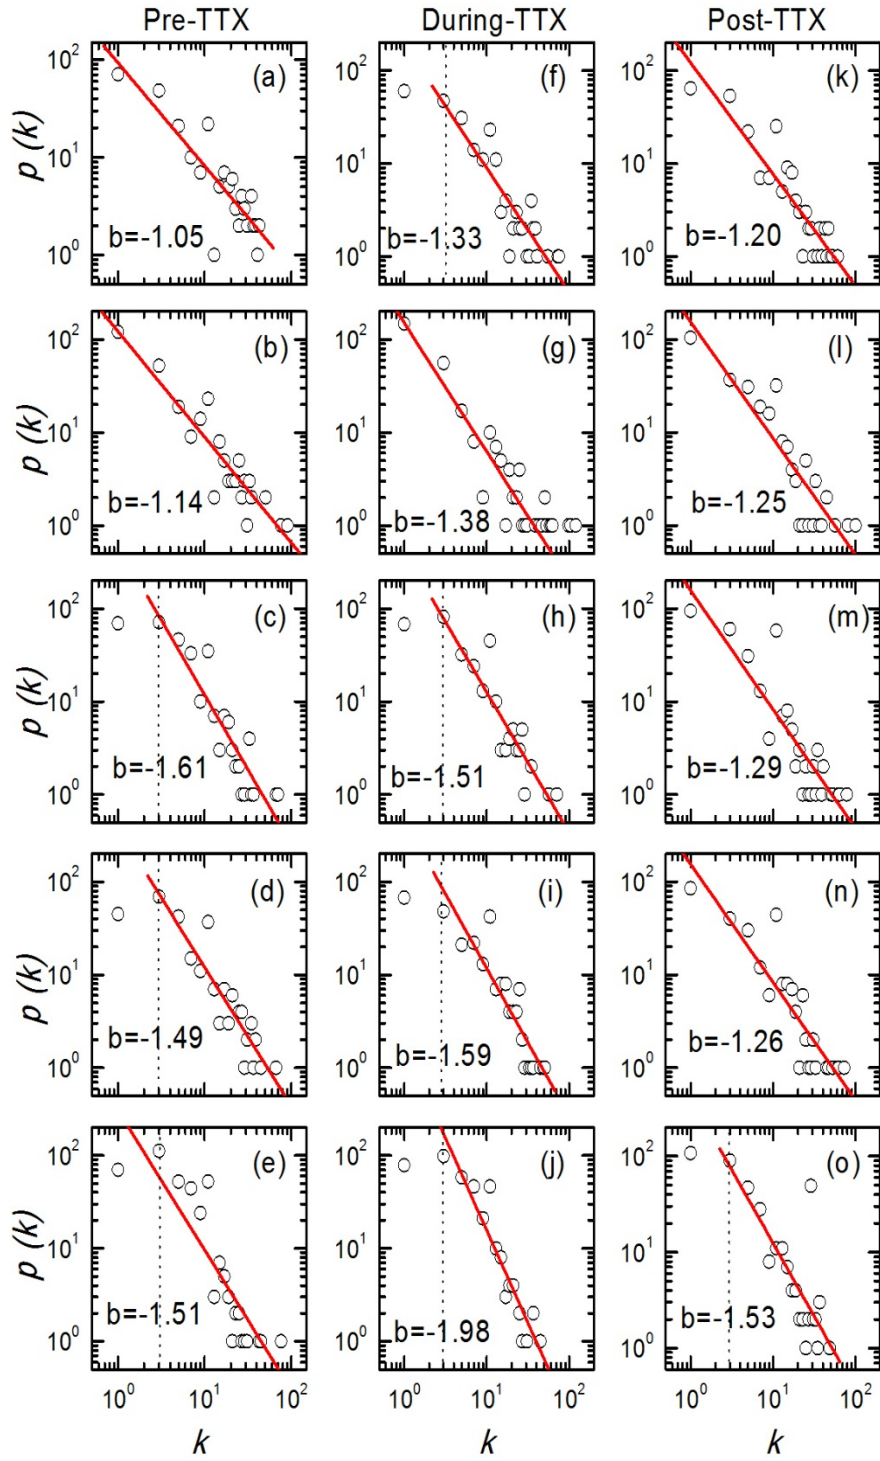

Fig. S2 The distribution of out-degree for each slice, (a-e) in the stage of pre-TTX, (f-j) in the stage of during-TTX, (k-o) in the stage of post-TTX. X-axis and Y-axis represents the node degree  $K_{out}$  and the number of nodes with  $K_{out}$ , respectively. The parameter  $b$  represents the slope of the fitted straight line, i.e., the scaling exponent. The dotted line indicates the start point for the fitted straight line

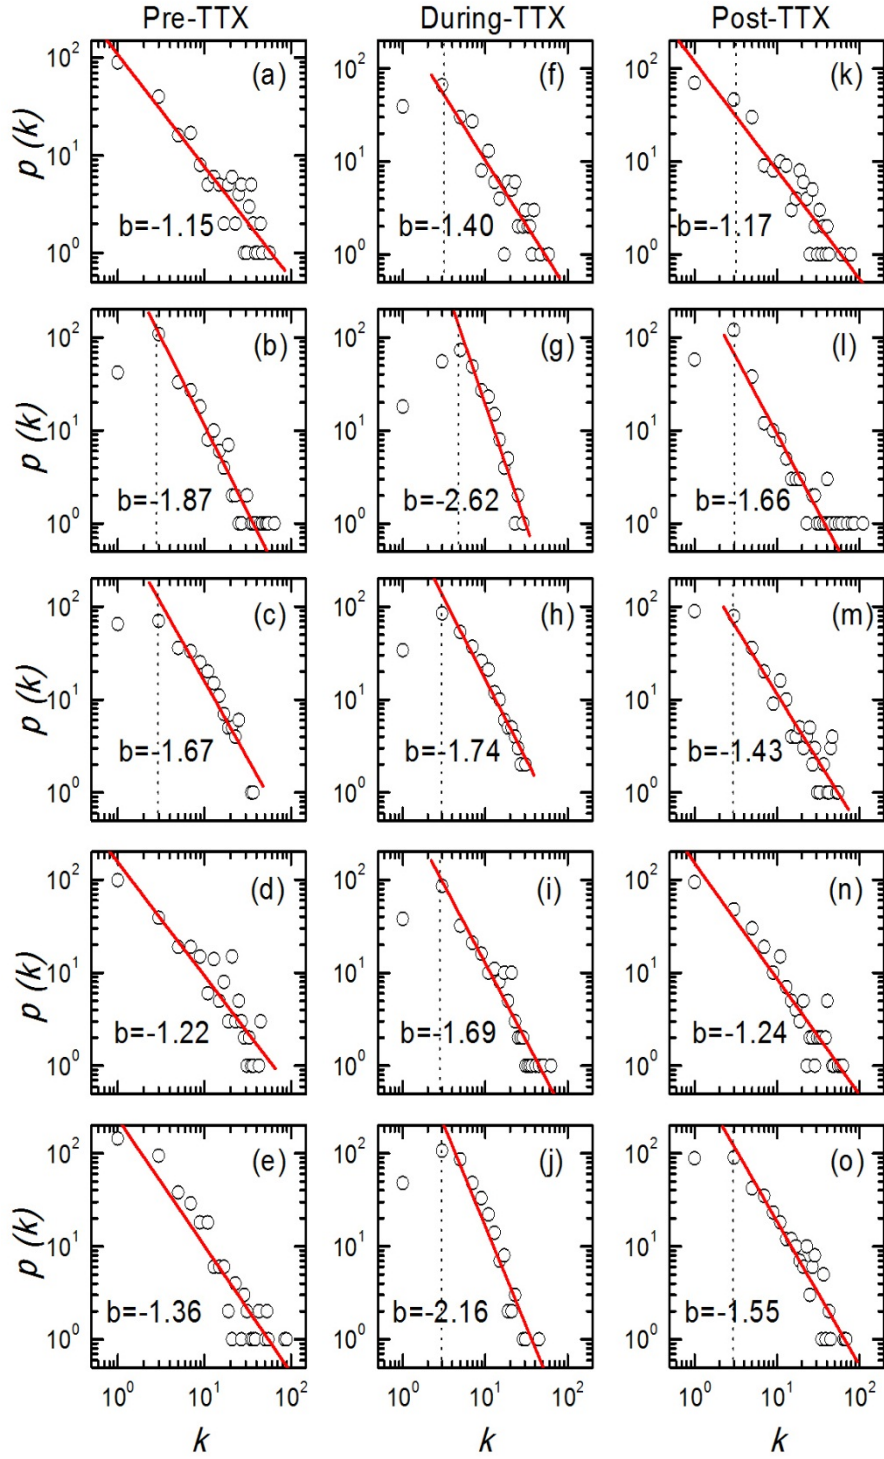

Fig. S3 The distribution of in-degree for each slice, (a-e) in the stage of pre-TTX, (f-j) in the stage of during-TTX, (k-o) in the stage of post-TTX. X-axis and Y-axis represents the node degree  $K_{in}$  and the number of nodes with  $K_{in}$ , respectively. The parameter  $b$  represents the slope of the fitted straight line, i.e., the scaling exponent. The dotted line indicates the start point for the fitted straight line

#### IV Correlation between out-degree and in-degree

We examine whether there is a correlation between out-degrees and in-degrees (Fig. S4). A negative correlation is observed in the stage of pre-TTX ( $R=-0.30\pm0.03$ , mean  $\pm$  se) and post-TTX ( $R=-0.29\pm0.03$ , mean  $\pm$  se), and weak or no correlation is observed in the stage of during-TTX ( $R=-0.08\pm0.1$ , mean  $\pm$  se). The correlation coefficient  $R$  is significantly larger in the stage of pre-TTX (paired t-test,  $P=0.01$ ) or post-TTX (paired t-test,  $P=0.01$ ) than in the stage of during-TTX. A negative correlation in the stage of pre-TTX and post-TTX represents that a node of a larger out-degree is likely to have a smaller in-degree, and vice versa, e.g., the neurons in the VL which have more out-links to the DM neurons, but have less in-links.

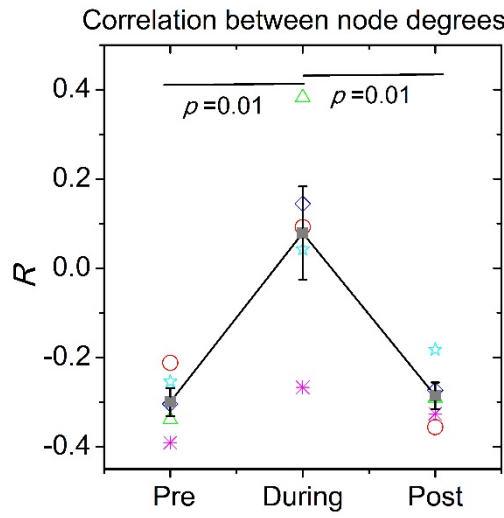

Fig. S4 The correlation coefficient  $R$  between out-degree and in-degree within each stage.

#### V Relationship between the synchronization and the average node-degree

We use the method of univariate/multiple linear regression to check the relationship of the synchronization degree  $\rho$  to the average node degree  $K$ . We find that the relationship is not significant. In particular, for univariate linear regression, the Pearson coefficient is  $R=0.5$  ( $P=0.06$ ). The results for multiple linear regression are as follows. The contribution of three variables, which are the average node degree, the disassortativity coefficient for the out-degrees and the disassortativity coefficient for the in-degrees, to the synchronization degree is examined by the method of multiple linear regression (sample size is  $3*5=15$ ). There is a significant linear relationship of the synchronization degree to these three variables together (Multiple  $R=0.88$ ,  $F$  of  $12.2 >$  Significance  $F$  of  $0.0008$ ). The relationship of the synchronization degree to the average node degree alone is not significant ( $P=0.99$ ), the relationship of the synchronization degree to the

disassortativity coefficient for the out-degrees alone is also not significant ( $P = 0.49$ ), but the relationship of the synchronization degree to the disassortativity coefficient for the in-degrees is significant ( $p = 0.001$ ). Therefore, we conclude that the effect of the average node degree is not significant.

## Reference

1. Alstott J, Bullmore E, Plenz D (2014) Powerlaw: a Python package for analysis of heavy-tailed distributions. *PLoS One* 9: e85777.
